# Supplementary material
Source: MDPI journal article supplement (https://www.mdpi.com/2075-163X/13/11/1427)
Supplement: s1 [file s1]

Supplementary Table S1 LA-ICP-MS U-Pb zircon ages of Wugongshan

| Sample No. | Concentration |         |         | Radiogenic ratios                    |        |                                     |        |                                     |        | Age (Ma)                             |     |                                     |    |                                     |    | Con. |
|------------|---------------|---------|---------|--------------------------------------|--------|-------------------------------------|--------|-------------------------------------|--------|--------------------------------------|-----|-------------------------------------|----|-------------------------------------|----|------|
|            | Th/U          | Th      | U       | <sup>207</sup> Pb/ <sup>206</sup> Pb | 1σ     | <sup>207</sup> Pb/ <sup>235</sup> U | 1σ     | <sup>206</sup> Pb/ <sup>238</sup> U | 1σ     | <sup>207</sup> Pb/ <sup>206</sup> Pb | 1σ  | <sup>207</sup> Pb/ <sup>235</sup> U | 1σ | <sup>206</sup> Pb/ <sup>238</sup> U | 1σ |      |
| CJZK06-1   | 0.46          | 553.27  | 1207.40 | 0.0544                               | 0.0004 | 0.5279                              | 0.0050 | 0.0705                              | 0.0005 | 387                                  | 19  | 430                                 | 3  | 439                                 | 3  | 98%  |
| CJZK06-2   | 0.58          | 741.00  | 1287.05 | 0.0619                               | 0.0006 | 0.6084                              | 0.0099 | 0.0709                              | 0.0008 | 672                                  | 25  | 483                                 | 6  | 442                                 | 5  | 91%  |
| CJZK06-3   | 0.45          | 522.08  | 1164.51 | 0.0562                               | 0.0005 | 0.5480                              | 0.0062 | 0.0708                              | 0.0006 | 461                                  | 22  | 444                                 | 4  | 441                                 | 4  | 99%  |
| CJZK06-4   | 0.36          | 378.55  | 1044.89 | 0.0566                               | 0.0005 | 0.5550                              | 0.0059 | 0.0711                              | 0.0004 | 476                                  | 20  | 448                                 | 4  | 443                                 | 3  | 98%  |
| CJZK06-5   | 0.40          | 594.57  | 1469.94 | 0.0560                               | 0.0006 | 0.5411                              | 0.0062 | 0.0702                              | 0.0005 | 454                                  | 24  | 439                                 | 4  | 437                                 | 3  | 99%  |
| CJZK06-6   | 0.32          | 494.92  | 1524.14 | 0.0559                               | 0.0004 | 0.5445                              | 0.0054 | 0.0706                              | 0.0005 | 450                                  | 17  | 441                                 | 4  | 440                                 | 3  | 99%  |
| CJZK06-7   | 0.41          | 424.26  | 1045.85 | 0.0563                               | 0.0005 | 0.5468                              | 0.0059 | 0.0705                              | 0.0005 | 465                                  | 20  | 443                                 | 4  | 439                                 | 3  | 99%  |
| CJZK06-8   | 0.32          | 384.13  | 1184.81 | 0.0577                               | 0.0005 | 0.5600                              | 0.0056 | 0.0705                              | 0.0005 | 517                                  | 51  | 452                                 | 4  | 439                                 | 3  | 97%  |
| CJZK06-9   | 0.51          | 736.56  | 1435.96 | 0.0564                               | 0.0006 | 0.5454                              | 0.0064 | 0.0702                              | 0.0005 | 478                                  | 29  | 442                                 | 4  | 437                                 | 3  | 98%  |
| CJZK06-10  | 0.45          | 839.24  | 1881.40 | 0.0561                               | 0.0007 | 0.5432                              | 0.0073 | 0.0703                              | 0.0005 | 457                                  | 28  | 441                                 | 5  | 438                                 | 3  | 99%  |
| CJZK06-11  | 0.34          | 435.99  | 1285.46 | 0.0572                               | 0.0005 | 0.5598                              | 0.0060 | 0.0711                              | 0.0006 | 498                                  | 19  | 451                                 | 4  | 443                                 | 4  | 98%  |
| CJZK06-12  | 0.35          | 398.33  | 1133.54 | 0.0569                               | 0.0005 | 0.5574                              | 0.0064 | 0.0711                              | 0.0006 | 487                                  | 14  | 450                                 | 4  | 443                                 | 3  | 98%  |
| CJZK06-13  | 0.24          | 277.15  | 1133.94 | 0.0552                               | 0.0005 | 0.5368                              | 0.0049 | 0.0707                              | 0.0005 | 420                                  | -14 | 436                                 | 3  | 441                                 | 3  | 99%  |
| CJZK06-14  | 0.81          | 1297.88 | 1600.56 | 0.0559                               | 0.0005 | 0.5407                              | 0.0058 | 0.0702                              | 0.0005 | 456                                  | 19  | 439                                 | 4  | 437                                 | 3  | 99%  |
| CJZK06-15  | 0.31          | 392.33  | 1272.00 | 0.0560                               | 0.0004 | 0.5445                              | 0.0054 | 0.0705                              | 0.0004 | 454                                  | 21  | 441                                 | 4  | 439                                 | 3  | 99%  |
| CJZK06-17  | 0.36          | 397.37  | 1109.38 | 0.0561                               | 0.0005 | 0.5482                              | 0.0057 | 0.0709                              | 0.0005 | 457                                  | 20  | 444                                 | 4  | 442                                 | 3  | 99%  |
| CJZK06-18  | 0.45          | 594.46  | 1333.93 | 0.0560                               | 0.0005 | 0.5432                              | 0.0065 | 0.0703                              | 0.0005 | 450                                  | 22  | 441                                 | 4  | 438                                 | 3  | 99%  |
| CJZK06-19  | 0.48          | 819.11  | 1706.46 | 0.0557                               | 0.0004 | 0.5422                              | 0.0048 | 0.0706                              | 0.0004 | 443                                  | 12  | 440                                 | 3  | 440                                 | 2  | 99%  |
| CJZK06-20  | 0.36          | 451.52  | 1252.17 | 0.0564                               | 0.0005 | 0.5483                              | 0.0053 | 0.0705                              | 0.0004 | 478                                  | 19  | 444                                 | 3  | 439                                 | 2  | 98%  |
| CJZK06-21  | 0.40          | 312.71  | 775.34  | 0.0586                               | 0.0006 | 0.5736                              | 0.0069 | 0.0710                              | 0.0006 | 554                                  | 20  | 460                                 | 4  | 442                                 | 4  | 95%  |
| CJZK06-22  | 0.36          | 688.81  | 1917.20 | 0.0558                               | 0.0007 | 0.5421                              | 0.0080 | 0.0704                              | 0.0005 | 443                                  | 31  | 440                                 | 5  | 439                                 | 3  | 99%  |
| CJZK06-23  | 0.30          | 287.64  | 947.42  | 0.0561                               | 0.0005 | 0.5442                              | 0.0052 | 0.0703                              | 0.0003 | 457                                  | 19  | 441                                 | 3  | 438                                 | 2  | 99%  |
| CJZK06-24  | 0.41          | 485.58  | 1170.16 | 0.0560                               | 0.0005 | 0.5455                              | 0.0054 | 0.0706                              | 0.0004 | 454                                  | 20  | 442                                 | 4  | 440                                 | 2  | 99%  |
| CJZK06-25  | 0.34          | 683.15  | 2029.72 | 0.0549                               | 0.0005 | 0.5316                              | 0.0054 | 0.0702                              | 0.0004 | 406                                  | 20  | 433                                 | 4  | 437                                 | 2  | 98%  |
| CJZK06-26  | 0.32          | 429.35  | 1341.48 | 0.0558                               | 0.0004 | 0.5419                              | 0.0049 | 0.0704                              | 0.0004 | 456                                  | 19  | 440                                 | 3  | 438                                 | 3  | 99%  |
| CJZK06-27  | 0.24          | 180.94  | 747.86  | 0.0561                               | 0.0006 | 0.5440                              | 0.0063 | 0.0703                              | 0.0004 | 457                                  | 24  | 441                                 | 4  | 438                                 | 3  | 99%  |
| CJZK06-28  | 0.58          | 741.00  | 1287.05 | 0.0619                               | 0.0006 | 0.6084                              | 0.0099 | 0.0709                              | 0.0005 | 387                                  | 19  | 430                                 | 3  | 439                                 | 3  | 98%  |
| CJZK06-29  | 0.45          | 522.08  | 1164.51 | 0.0562                               | 0.0005 | 0.5480                              | 0.0062 | 0.0708                              | 0.0008 | 672                                  | 25  | 483                                 | 6  | 442                                 | 5  | 91%  |
| CJZK06-30  | 0.36          | 378.55  | 1044.89 | 0.0566                               | 0.0005 | 0.5550                              | 0.0059 | 0.0711                              | 0.0006 | 461                                  | 22  | 444                                 | 4  | 441                                 | 4  | 99%  |
| CJZK06-31  | 0.40          | 594.57  | 1469.94 | 0.0560                               | 0.0006 | 0.5411                              | 0.0062 | 0.0702                              | 0.0004 | 476                                  | 20  | 448                                 | 4  | 443                                 | 3  | 98%  |

|            |        |        |         |         |         |         |         |        |        |     |        |     |    |     |   |     |
|------------|--------|--------|---------|---------|---------|---------|---------|--------|--------|-----|--------|-----|----|-----|---|-----|
| WGS0602-1  | 0.26   | 165.90 | 631.98  | 0.0584  | 0.0007  | 0.5759  | 0.0087  | 0.0714 | 0.0013 | 762 | 0.0005 | 543 | 28 | 462 | 6 | 96% |
| WGS0602-2  | 0.34   | 152.74 | 448.37  | 0.0564  | 0.0008  | 0.5495  | 0.0083  | 0.0706 | 0.0013 | 784 | 0.0004 | 478 | 33 | 445 | 5 | 98% |
| WGS0602-3  | 0.35   | 316.80 | 904.99  | 0.0574  | 0.0006  | 0.5603  | 0.0057  | 0.0709 | 0.0011 | 862 | 0.0004 | 506 | 22 | 452 | 4 | 97% |
| WGS0602-4  | 0.43   | 229.56 | 532.04  | 0.0566  | 0.0008  | 0.5499  | 0.0079  | 0.0704 | 0.0013 | 754 | 0.0004 | 476 | 25 | 445 | 5 | 98% |
| WGS0602-5  | 0.38   | 289.16 | 763.60  | 0.0574  | 0.0006  | 0.5590  | 0.0061  | 0.0706 | 0.0012 | 860 | 0.0004 | 509 | 22 | 451 | 4 | 97% |
| WGS0602-6  | 0.34   | 128.35 | 378.08  | 0.0572  | 0.0009  | 0.5551  | 0.0082  | 0.0705 | 0.0012 | 795 | 0.0004 | 498 | 33 | 448 | 5 | 97% |
| WGS0602-7  | 0.34   | 109.62 | 321.89  | 0.0555  | 0.0011  | 0.5389  | 0.0108  | 0.0706 | 0.0012 | 875 | 0.0005 | 432 | 46 | 438 | 7 | 99% |
| WGS0602-8  | 0.27   | 312.99 | 1147.52 | 0.0567  | 0.0006  | 0.5519  | 0.0068  | 0.0705 | 0.0012 | 772 | 0.0004 | 480 | 22 | 446 | 4 | 98% |
| WGS0602-9  | 0.36   | 236.09 | 646.99  | 0.0566  | 0.0006  | 0.5502  | 0.0064  | 0.0705 | 0.0012 | 760 | 0.0004 | 476 | 24 | 445 | 4 | 98% |
| WGS0602-10 | 260.62 | 234.66 | 453.1   | 0.06735 | 0.00127 | 1.13538 | 0.02054 | 0.1223 | 0.0004 | 500 | 16     | 448 | 4  | 440 | 2 | 98% |
| WGS0602-11 | 310.62 | 253.12 | 617.93  | 0.06624 | 0.001   | 0.99961 | 0.01427 | 0.1095 | 0.0004 | 487 | 22     | 449 | 4  | 441 | 2 | 98% |
| WGS0602-12 | 190.19 | 151.28 | 318.31  | 0.06552 | 0.00109 | 1.16658 | 0.01856 | 0.1292 | 0.0004 | 478 | 31     | 443 | 5  | 438 | 2 | 98% |
| WGS0602-13 | 311.75 | 258.44 | 587.61  | 0.06879 | 0.00104 | 1.09585 | 0.01562 | 0.1156 | 0.0005 | 561 | 47     | 459 | 7  | 439 | 3 | 95% |
| WGS0602-14 | 413.69 | 506.75 | 803.68  | 0.06542 | 0.00095 | 0.99633 | 0.01372 | 0.1105 | 0.0004 | 561 | 35     | 459 | 6  | 439 | 2 | 95% |
| WGS0602-15 | 234.29 | 153.23 | 449.91  | 0.06819 | 0.00108 | 1.0724  | 0.01613 | 0.1141 | 0.0006 | 524 | 37     | 458 | 7  | 444 | 3 | 96% |
| WGS0602-16 | 148.56 | 121.59 | 241.29  | 0.06376 | 0.00116 | 1.15483 | 0.02007 | 0.1314 | 0.0005 | 524 | 26     | 453 | 5  | 440 | 3 | 96% |
| WGS0602-17 | 265.88 | 297.15 | 567.32  | 0.06563 | 0.00105 | 0.91278 | 0.01386 | 0.1009 | 0.0005 | 465 | 57     | 444 | 9  | 441 | 3 | 99% |
| WGS0602-18 | 220.65 | 192.03 | 374.04  | 0.06474 | 0.00106 | 1.13259 | 0.0176  | 0.1269 | 0.0004 | 524 | 40     | 454 | 6  | 441 | 3 | 97% |
| WGS0602-19 | 212.64 | 146.86 | 361.38  | 0.06459 | 0.00106 | 1.14157 | 0.0178  | 0.1282 | 0.0004 | 443 | 8      | 439 | 7  | 439 | 3 | 99% |
| WGS0602-20 | 0.45   | 594.46 | 1333.93 | 0.0560  | 0.0005  | 0.5432  | 0.0065  | 0.0703 | 0.0005 | 478 | 22     | 447 | 4  | 443 | 3 | 98% |
| WGS0602-21 | 0.48   | 819.11 | 1706.46 | 0.0557  | 0.0004  | 0.5422  | 0.0048  | 0.0706 | 0.0004 | 480 | 19     | 447 | 3  | 440 | 2 | 98% |
| WGS0602-22 | 0.36   | 451.52 | 1252.17 | 0.0564  | 0.0005  | 0.5483  | 0.0053  | 0.0705 | 0.0005 | 443 | 22     | 440 | 5  | 439 | 3 | 99% |
| WGS0602-23 | 0.40   | 312.71 | 775.34  | 0.0586  | 0.0006  | 0.5736  | 0.0069  | 0.0710 | 0.0004 | 500 | 31     | 449 | 5  | 440 | 2 | 97% |
| WGS0602-24 | 0.36   | 688.81 | 1917.20 | 0.0558  | 0.0007  | 0.5421  | 0.0080  | 0.0704 | 0.0006 | 439 | 32     | 441 | 5  | 440 | 4 | 99% |
| WGS0602-25 | 0.30   | 287.64 | 947.42  | 0.0561  | 0.0005  | 0.5442  | 0.0052  | 0.0703 | 0.0004 | 454 | 22     | 445 | 4  | 443 | 3 | 99% |
| WGS0602-26 | 0.41   | 485.58 | 1170.16 | 0.0560  | 0.0005  | 0.5455  | 0.0054  | 0.0706 | 0.0006 | 520 | 46     | 455 | 8  | 443 | 4 | 97% |
| WGS0602-27 | 0.34   | 683.15 | 2029.72 | 0.0549  | 0.0005  | 0.5316  | 0.0054  | 0.0702 | 0.0005 | 478 | 30     | 444 | 5  | 440 | 3 | 98% |
| WGS0602-29 | 0.32   | 429.35 | 1341.48 | 0.0558  | 0.0004  | 0.5419  | 0.0049  | 0.0704 | 0.0004 | 500 | 16     | 448 | 4  | 440 | 2 | 98% |
| WGS0602-1  | 0.70   | 112.21 | 159.70  | 0.0579  | 0.0016  | 0.5677  | 0.0163  | 0.0713 | 0.0006 | 528 | 61     | 457 | 11 | 444 | 4 | 97% |
| WGS0602-2  | 0.47   | 110.06 | 234.05  | 0.0555  | 0.0010  | 0.5387  | 0.0092  | 0.0707 | 0.0005 | 435 | 39     | 438 | 6  | 440 | 3 | 99% |
| WGS0602-3  | 0.81   | 181.42 | 223.00  | 0.0604  | 0.0015  | 0.5847  | 0.0143  | 0.0703 | 0.0005 | 620 | 54     | 467 | 9  | 438 | 3 | 93% |
| WGS0602-4  | 0.82   | 121.36 | 147.97  | 0.0579  | 0.0013  | 0.5605  | 0.0130  | 0.0704 | 0.0006 | 524 | 50     | 452 | 8  | 439 | 3 | 97% |
| WGS0602-5  | 0.52   | 134.18 | 257.51  | 0.0587  | 0.0010  | 0.5673  | 0.0095  | 0.0702 | 0.0004 | 567 | 35     | 456 | 6  | 437 | 2 | 95% |

|            |      |        |        |        |        |        |        |        |        |     |    |     |    |     |   |     |
|------------|------|--------|--------|--------|--------|--------|--------|--------|--------|-----|----|-----|----|-----|---|-----|
| WGS0602-6  | 0.63 | 167.24 | 265.50 | 0.0595 | 0.0010 | 0.5779 | 0.0102 | 0.0705 | 0.0004 | 587 | 44 | 463 | 7  | 439 | 3 | 94% |
| WGS0602-7  | 0.43 | 59.11  | 136.61 | 0.0558 | 0.0013 | 0.5457 | 0.0127 | 0.0715 | 0.0006 | 443 | 52 | 442 | 8  | 445 | 4 | 99% |
| WGS0602-8  | 0.38 | 75.43  | 201.06 | 0.0561 | 0.0013 | 0.5502 | 0.0128 | 0.0713 | 0.0006 | 457 | 50 | 445 | 8  | 444 | 4 | 99% |
| WGS0602-9  | 0.43 | 66.58  | 156.23 | 0.0570 | 0.0011 | 0.5591 | 0.0113 | 0.0712 | 0.0005 | 500 | 38 | 451 | 7  | 444 | 3 | 98% |
| WGS0602-10 | 0.78 | 102.78 | 131.63 | 0.0610 | 0.0016 | 0.5891 | 0.0155 | 0.0703 | 0.0005 | 639 | 56 | 470 | 10 | 438 | 3 | 92% |
| WGS0602-11 | 0.45 | 58.33  | 128.29 | 0.0559 | 0.0015 | 0.5488 | 0.0150 | 0.0714 | 0.0006 | 456 | 61 | 444 | 10 | 445 | 4 | 99% |
| WGS0602-12 | 0.45 | 215.56 | 477.93 | 0.0581 | 0.0007 | 0.5630 | 0.0077 | 0.0703 | 0.0004 | 532 | 28 | 454 | 5  | 438 | 2 | 96% |
| WGS0602-13 | 0.41 | 111.79 | 275.96 | 0.0582 | 0.0009 | 0.5711 | 0.0090 | 0.0713 | 0.0005 | 600 | 33 | 459 | 6  | 444 | 3 | 96% |
| WGS0602-14 | 0.68 | 140.44 | 205.29 | 0.0581 | 0.0012 | 0.5632 | 0.0114 | 0.0704 | 0.0005 | 600 | 38 | 454 | 7  | 439 | 3 | 96% |
| WGS0602-15 | 0.66 | 150.56 | 228.44 | 0.0551 | 0.0009 | 0.5361 | 0.0089 | 0.0705 | 0.0004 | 417 | 32 | 436 | 6  | 439 | 3 | 99% |
| WGS0602-16 | 0.71 | 113.64 | 159.58 | 0.0577 | 0.0014 | 0.5568 | 0.0126 | 0.0702 | 0.0005 | 520 | 54 | 449 | 8  | 438 | 3 | 97% |
| WGS0602-17 | 0.66 | 71.16  | 107.97 | 0.0590 | 0.0017 | 0.5741 | 0.0164 | 0.0710 | 0.0006 | 565 | 63 | 461 | 11 | 442 | 4 | 95% |
| WGS0602-18 | 0.54 | 87.36  | 163.24 | 0.0572 | 0.0015 | 0.5630 | 0.0148 | 0.0715 | 0.0006 | 498 | 64 | 453 | 10 | 445 | 4 | 98% |
| WGS0602-19 | 0.46 | 82.82  | 179.62 | 0.0572 | 0.0011 | 0.5539 | 0.0105 | 0.0703 | 0.0004 | 498 | 41 | 448 | 7  | 438 | 3 | 97% |
| WGS0602-20 | 1.08 | 304.27 | 280.90 | 0.0563 | 0.0009 | 0.5541 | 0.0094 | 0.0714 | 0.0005 | 465 | 34 | 448 | 6  | 445 | 3 | 99% |
| WGS0602-21 | 0.49 | 84.74  | 174.64 | 0.0580 | 0.0011 | 0.5613 | 0.0109 | 0.0702 | 0.0004 | 532 | 43 | 452 | 7  | 437 | 3 | 96% |
| WGS0602-22 | 0.62 | 187.99 | 303.45 | 0.0554 | 0.0009 | 0.5353 | 0.0081 | 0.0702 | 0.0004 | 428 | 35 | 435 | 5  | 437 | 2 | 99% |
| WGS0602-23 | 0.68 | 119.79 | 176.10 | 0.0571 | 0.0013 | 0.5539 | 0.0124 | 0.0704 | 0.0005 | 494 | 50 | 448 | 8  | 438 | 3 | 97% |
| WGS0602-24 | 0.42 | 104.95 | 251.90 | 0.0570 | 0.0013 | 0.5522 | 0.0126 | 0.0702 | 0.0005 | 500 | 48 | 446 | 8  | 437 | 3 | 97% |
| WGS0602-25 | 0.67 | 77.60  | 115.01 | 0.0590 | 0.0020 | 0.5698 | 0.0182 | 0.0703 | 0.0006 | 569 | 74 | 458 | 12 | 438 | 3 | 95% |
| WGS0602-26 | 0.44 | 100.27 | 229.10 | 0.0557 | 0.0011 | 0.5483 | 0.0105 | 0.0714 | 0.0005 | 439 | 44 | 444 | 7  | 445 | 3 | 99% |
| WGS0602-27 | 0.46 | 68.79  | 150.14 | 0.0603 | 0.0016 | 0.5829 | 0.0146 | 0.0703 | 0.0005 | 613 | 83 | 466 | 9  | 438 | 3 | 93% |
| WGS0602-28 | 0.71 | 176.15 | 248.07 | 0.0566 | 0.0010 | 0.5586 | 0.0100 | 0.0715 | 0.0006 | 528 | 61 | 457 | 11 | 444 | 4 | 97% |
| WGS0602-29 | 0.61 | 276.17 | 450.34 | 0.0572 | 0.0008 | 0.5584 | 0.0088 | 0.0705 | 0.0005 | 435 | 39 | 438 | 6  | 440 | 3 | 99% |
| WGS0602-30 | 0.55 | 172.81 | 311.98 | 0.0556 | 0.0010 | 0.5400 | 0.0098 | 0.0704 | 0.0005 | 620 | 54 | 467 | 9  | 438 | 3 | 93% |
| WGS0602-31 | 0.33 | 84.43  | 258.52 | 0.0574 | 0.0010 | 0.5606 | 0.0091 | 0.0710 | 0.0006 | 524 | 50 | 452 | 8  | 439 | 3 | 97% |
