# Supplementary material
Source: MDPI journal article supplement (https://www.mdpi.com/2075-163X/13/11/1427)
Supplement: s1 [file s1]

**Supplementary table S2 Whole-rock major–oxide (wt.%) compositions of the Wugongshan granites**

| Sample No. | SiO <sub>2</sub> | TiO <sub>2</sub> | Al <sub>2</sub> O <sub>3</sub> | Fe <sub>2</sub> O <sub>3</sub> | FeO  | MnO   | MgO  | CaO  | Na <sub>2</sub> O | K <sub>2</sub> O | P <sub>2</sub> O <sub>5</sub> | LOI  | TOTAL | TFe <sub>2</sub> O <sub>3</sub> | A/CNK  | ALK  | A/NK   |
|------------|------------------|------------------|--------------------------------|--------------------------------|------|-------|------|------|-------------------|------------------|-------------------------------|------|-------|---------------------------------|--------|------|--------|
| CJZK05-1   | 70.83            | 0.33             | 14.25                          | 0.58                           | 1.77 | 0.060 | 1.02 | 1.91 | 3.06              | 4.49             | 0.110                         | 1.30 | 99.91 | 2.55                            | 18.35  | 2.93 | 6.26   |
| CJZK05-2   | 70.98            | 0.33             | 14.51                          | 0.49                           | 1.93 | 0.061 | 1.23 | 2.70 | 3.17              | 3.75             | 0.110                         | 0.46 | 99.92 | 2.63                            | 14.05  | 3.93 | 3.58   |
| DJFZK02-3  | 72.32            | 0.33             | 14.13                          | 0.30                           | 2.26 | 0.033 | 0.54 | 2.70 | 2.81              | 3.62             | 0.089                         | 0.43 | 99.81 | 2.81                            | 18.73  | 3.24 | 5.79   |
| DJFZK02-4  | 71.56            | 0.37             | 13.80                          | 0.49                           | 2.35 | 0.045 | 0.70 | 1.63 | 2.99              | 3.72             | 0.094                         | 1.80 | 99.80 | 3.10                            | 23.89  | 2.33 | 10.25  |
| DJFZK01-1  | 71.6954          | 0.36             | 14.3077                        | 1.45                           | 1.54 | 0.041 | 0.60 | 2.96 | 2.95              | 3.11             | 0.091                         | 0.53 | 99.82 | 3.16                            | 16.82  | 3.56 | 4.73   |
| DJFZK01-2  | 72.8805          | 0.30             | 13.7155                        | 0.26                           | 2.28 | 0.048 | 0.56 | 2.34 | 2.91              | 3.67             | 0.081                         | 0.55 | 99.86 | 2.80                            | 20.56  | 2.90 | 7.08   |
| XQZK11-1   | 74.52            | 0.04             | 14.35                          | 0.25                           | 0.38 | 0.103 | 0.13 | 0.62 | 4.36              | 4.26             | 0.150                         | 0.77 | 99.98 | 0.67                            | 69.53  | 0.75 | 92.57  |
| XQZK11-2   | 75.15            | 0.23             | 12.60                          | 0.33                           | 1.54 | 0.034 | 0.48 | 2.15 | 2.41              | 3.76             | 0.052                         | 0.98 | 99.89 | 2.04                            | 23.59  | 2.64 | 8.95   |
| XQZK12-3   | 72.35            | 0.22             | 14.84                          | 0.53                           | 1.10 | 0.047 | 0.57 | 2.12 | 3.66              | 3.31             | 0.130                         | 0.94 | 99.92 | 1.75                            | 21.83  | 2.69 | 8.12   |
| XQZK13-2   | 66.95            | 0.59             | 14.93                          | 0.88                           | 3.14 | 0.058 | 1.40 | 3.31 | 2.24              | 3.00             | 0.128                         | 2.88 | 99.86 | 4.37                            | 11.17  | 4.71 | 2.37   |
| XQZK13-4   | 65.77            | 0.45             | 12.16                          | 1.14                           | 1.95 | 0.063 | 1.05 | 5.90 | 2.54              | 2.64             | 0.114                         | 5.91 | 99.89 | 3.30                            | 8.00   | 6.94 | 1.15   |
| XQZK12-5   | 73.35            | 0.17             | 14.34                          | 0.35                           | 0.81 | 0.044 | 0.36 | 0.89 | 3.75              | 4.69             | 0.196                         | 0.90 | 99.95 | 1.26                            | 44.99  | 1.25 | 36.09  |
| CJZK06-2   | 69.63            | 0.39             | 14.70                          | 0.81                           | 2.02 | 0.073 | 1.34 | 2.67 | 3.18              | 3.75             | 0.112                         | 1.00 | 99.92 | 3.06                            | 13.30  | 4.02 | 3.31   |
| CJZK06-4   | 69.24            | 0.33             | 15.46                          | 0.62                           | 1.53 | 0.045 | 1.00 | 1.09 | 3.16              | 4.95             | 0.099                         | 2.23 | 99.93 | 2.33                            | 23.82  | 2.09 | 11.39  |
| WGS06027   | 75.82            | 0.02             | 14.18                          | 0.23                           | 0.30 | 0.047 | 0.08 | 0.40 | 4.46              | 3.60             | 0.051                         | 0.75 | 99.97 | 0.56                            | 116.30 | 0.48 | 241.05 |
| WGS06028   | 72.37            | 0.27             | 14.60                          | 0.72                           | 1.59 | 0.046 | 0.63 | 0.95 | 3.51              | 3.37             | 0.068                         | 1.49 | 99.80 | 2.49                            | 33.58  | 1.59 | 21.18  |
