# Supplementary material
Source: MDPI journal article supplement (https://www.mdpi.com/2075-163X/13/11/1427)
Supplement: s1 [file s1]

Supplementary table S4 Zircon Hf isotopic compositions of the Wugongshan granites.

| Sample No.     | Age<br>(Ma) | $^{176}\text{Hf}/^{177}\text{Hf}$ | 2 $\sigma$ | $^{176}\text{Lu}/^{177}\text{Hf}$ | 2 $\sigma$ | $^{176}\text{Yb}/^{177}\text{Hf}$ | 2 $\sigma$ | $\epsilon_{\text{Hf}}(0)$ | $\epsilon_{\text{Hf}}(t)$ | 2 $\sigma$ | $T_{\text{DM1}}$ (Ma) | $T_{\text{DM2}}$ (Ma) | $f_{\text{Lu/Hf}}$ |
|----------------|-------------|-----------------------------------|------------|-----------------------------------|------------|-----------------------------------|------------|---------------------------|---------------------------|------------|-----------------------|-----------------------|--------------------|
| CJK06-2(N=15)  |             |                                   |            |                                   |            |                                   |            |                           |                           |            |                       |                       |                    |
| 1              | 438.9       | 0.282334                          | 0.000012   | 0.001224                          | 0.000012   | 0.031727                          | 0.000325   | -15.5                     | -6.2                      | 0.4        | 1305                  | 1809                  | -0.96              |
| 2              | 438.9       | 0.282311                          | 0.000010   | 0.002222                          | 0.000029   | 0.050636                          | 0.000311   | -16.3                     | -7.3                      | 0.4        | 1374                  | 1878                  | -0.93              |
| 3              | 438.9       | 0.282324                          | 0.000011   | 0.001305                          | 0.000005   | 0.033557                          | 0.000183   | -15.8                     | -6.6                      | 0.4        | 1322                  | 1833                  | -0.96              |
| 4              | 438.9       | 0.282329                          | 0.000012   | 0.002098                          | 0.000027   | 0.056002                          | 0.001034   | -15.7                     | -6.6                      | 0.4        | 1343                  | 1836                  | -0.94              |
| 5              | 438.9       | 0.282306                          | 0.000012   | 0.001386                          | 0.000036   | 0.036215                          | 0.000897   | -16.5                     | -7.2                      | 0.4        | 1351                  | 1875                  | -0.96              |
| 6              | 438.9       | 0.282285                          | 0.000011   | 0.001280                          | 0.000011   | 0.033894                          | 0.000415   | -17.2                     | -7.9                      | 0.4        | 1376                  | 1918                  | -0.96              |
| 7              | 438.9       | 0.282321                          | 0.000012   | 0.001262                          | 0.000005   | 0.031733                          | 0.000245   | -16.0                     | -6.7                      | 0.4        | 1325                  | 1839                  | -0.96              |
| 8              | 438.9       | 0.282316                          | 0.000011   | 0.001096                          | 0.000037   | 0.027673                          | 0.000873   | -16.5                     | -7.1                      | 0.4        | 1339                  | 1867                  | -0.97              |
| 9              | 438.9       | 0.282337                          | 0.000013   | 0.001187                          | 0.000012   | 0.030498                          | 0.000400   | -15.7                     | -6.4                      | 0.5        | 1313                  | 1823                  | -0.96              |
| 10             | 438.9       | 0.282324                          | 0.000013   | 0.001895                          | 0.000014   | 0.049311                          | 0.000469   | -16.4                     | -7.3                      | 0.5        | 1365                  | 1878                  | -0.94              |
| 11             | 438.9       | 0.282314                          | 0.000012   | 0.001381                          | 0.000012   | 0.034885                          | 0.000418   | -16.6                     | -7.4                      | 0.4        | 1356                  | 1883                  | -0.96              |
| 12             | 438.9       | 0.282305                          | 0.000013   | 0.001232                          | 0.000008   | 0.030656                          | 0.000318   | -16.9                     | -7.6                      | 0.5        | 1360                  | 1896                  | -0.96              |
| 13             | 438.9       | 0.282322                          | 0.000013   | 0.001408                          | 0.000008   | 0.035488                          | 0.000256   | -16.3                     | -7.1                      | 0.5        | 1345                  | 1865                  | -0.96              |
| 14             | 438.9       | 0.282295                          | 0.000011   | 0.001160                          | 0.000027   | 0.029766                          | 0.000685   | -17.2                     | -7.9                      | 0.4        | 1370                  | 1915                  | -0.97              |
| 15             | 438.9       | 0.282250                          | 0.000012   | 0.000889                          | 0.000008   | 0.022966                          | 0.000170   | -18.7                     | -9.3                      | 0.4        | 1421                  | 2006                  | -0.97              |
| WGS06022(N=16) |             |                                   |            |                                   |            |                                   |            |                           |                           |            |                       |                       |                    |
| 2              | 439.4       | 0.282300                          | 0.000012   | 0.001867                          | 0.000019   | 0.052601                          | 0.000508   | -17.2                     | -8.1                      | 0.4        | 1398                  | 1930                  | -0.94              |
| 3              | 439.4       | 0.282244                          | 0.000013   | 0.001315                          | 0.000009   | 0.035537                          | 0.000263   | -19.1                     | -9.8                      | 0.5        | 1450                  | 2035                  | -0.96              |
| 4              | 439.4       | 0.282253                          | 0.000012   | 0.002144                          | 0.000013   | 0.061007                          | 0.000474   | -19.0                     | -10.0                     | 0.4        | 1480                  | 2045                  | -0.94              |
| 5              | 439.4       | 0.282227                          | 0.000012   | 0.001123                          | 0.000007   | 0.030485                          | 0.000326   | -19.6                     | -10.3                     | 0.4        | 1465                  | 2066                  | -0.97              |
| 6              | 439.4       | 0.282224                          | 0.000012   | 0.000715                          | 0.000014   | 0.019433                          | 0.000364   | -19.6                     | -10.1                     | 0.4        | 1448                  | 2056                  | -0.98              |
| 7              | 439.4       | 0.282231                          | 0.000012   | 0.000785                          | 0.000008   | 0.021438                          | 0.000277   | -19.4                     | -10.0                     | 0.4        | 1443                  | 2045                  | -0.98              |
| 8              | 439.4       | 0.282239                          | 0.000013   | 0.001227                          | 0.000024   | 0.034668                          | 0.000699   | -19.2                     | -9.9                      | 0.5        | 1453                  | 2043                  | -0.96              |
| 9              | 439.4       | 0.282245                          | 0.000011   | 0.001222                          | 0.000017   | 0.034746                          | 0.000539   | -19.0                     | -9.7                      | 0.4        | 1445                  | 2030                  | -0.96              |
| 10             | 439.4       | 0.282274                          | 0.000014   | 0.001384                          | 0.000007   | 0.039570                          | 0.000182   | -18.0                     | -8.8                      | 0.5        | 1412                  | 1971                  | -0.96              |
| 11             | 439.4       | 0.282219                          | 0.000013   | 0.001162                          | 0.000010   | 0.031936                          | 0.000253   | -19.9                     | -10.6                     | 0.5        | 1478                  | 2086                  | -0.96              |
| 12             | 439.4       | 0.282225                          | 0.000014   | 0.001195                          | 0.000016   | 0.032441                          | 0.000394   | -19.7                     | -10.4                     | 0.5        | 1471                  | 2072                  | -0.96              |
| 13             | 439.4       | 0.282247                          | 0.000013   | 0.001080                          | 0.000024   | 0.030342                          | 0.000755   | -18.9                     | -9.6                      | 0.5        | 1435                  | 2021                  | -0.97              |
| 14             | 439.4       | 0.282239                          | 0.000013   | 0.001193                          | 0.000003   | 0.032606                          | 0.000148   | -19.2                     | -9.9                      | 0.5        | 1451                  | 2041                  | -0.96              |

|                |       |          |          |          |          |          |          |       |       |     |      |      |       |
|----------------|-------|----------|----------|----------|----------|----------|----------|-------|-------|-----|------|------|-------|
| 15             | 439.4 | 0.282234 | 0.000013 | 0.001257 | 0.000005 | 0.035852 | 0.000246 | -19.4 | -10.1 | 0.5 | 1462 | 2055 | -0.96 |
| 16             | 439.4 | 0.282238 | 0.000014 | 0.001508 | 0.000012 | 0.042935 | 0.000468 | -19.3 | -10.1 | 0.5 | 1469 | 2056 | -0.95 |
| 17             | 439.4 | 0.282266 | 0.000013 | 0.001229 | 0.000008 | 0.033532 | 0.000191 | -18.3 | -9.0  | 0.5 | 1416 | 1983 | -0.96 |
| WGS06028(N=18) |       |          |          |          |          |          |          |       |       |     |      |      |       |
| 1              | 441.9 | 0.282202 | 0.000017 | 0.001896 | 0.000040 | 0.052406 | 0.001254 | -20.7 | -11.6 | 0.6 | 1540 | 2148 | -0.94 |
| 2              | 441.9 | 0.282234 | 0.000016 | 0.000934 | 0.000008 | 0.026741 | 0.000327 | -19.3 | -9.9  | 0.5 | 1445 | 2042 | -0.97 |
| 3              | 441.9 | 0.282208 | 0.000015 | 0.001059 | 0.000004 | 0.029829 | 0.000169 | -20.2 | -10.9 | 0.5 | 1488 | 2104 | -0.97 |
| 4              | 441.9 | 0.282253 | 0.000018 | 0.001762 | 0.000007 | 0.048277 | 0.000371 | -18.9 | -9.7  | 0.6 | 1461 | 2030 | -0.95 |
| 5              | 441.9 | 0.282245 | 0.000015 | 0.001207 | 0.000005 | 0.032411 | 0.000098 | -19.0 | -9.6  | 0.5 | 1444 | 2028 | -0.96 |
| 6              | 441.9 | 0.282279 | 0.000018 | 0.001328 | 0.000007 | 0.034648 | 0.000175 | -17.8 | -8.5  | 0.6 | 1402 | 1957 | -0.96 |
| 7              | 441.9 | 0.282262 | 0.000016 | 0.002018 | 0.000008 | 0.058703 | 0.000503 | -18.6 | -9.5  | 0.6 | 1461 | 2019 | -0.94 |
| 8              | 441.9 | 0.282250 | 0.000021 | 0.001895 | 0.000031 | 0.052277 | 0.000748 | -19.0 | -9.9  | 0.7 | 1471 | 2041 | -0.94 |
| 9              | 441.9 | 0.282264 | 0.000017 | 0.001074 | 0.000013 | 0.029209 | 0.000454 | -18.3 | -8.9  | 0.6 | 1411 | 1981 | -0.97 |
| 10             | 441.9 | 0.282286 | 0.000019 | 0.001314 | 0.000020 | 0.036665 | 0.000539 | -17.6 | -8.3  | 0.7 | 1392 | 1940 | -0.96 |
| 11             | 441.9 | 0.282250 | 0.000019 | 0.001912 | 0.000021 | 0.050289 | 0.000468 | -19.0 | -9.9  | 0.7 | 1472 | 2042 | -0.94 |
| 12             | 441.9 | 0.282235 | 0.000015 | 0.001302 | 0.000004 | 0.033696 | 0.000088 | -19.4 | -10.0 | 0.5 | 1462 | 2052 | -0.96 |
| 13             | 441.9 | 0.282263 | 0.000015 | 0.002952 | 0.000035 | 0.075212 | 0.000795 | -18.9 | -10.0 | 0.5 | 1509 | 2052 | -0.91 |
| 14             | 441.9 | 0.282228 | 0.000014 | 0.001291 | 0.000005 | 0.034590 | 0.000270 | -19.6 | -10.3 | 0.5 | 1472 | 2068 | -0.96 |
| 15             | 441.9 | 0.282245 | 0.000014 | 0.001421 | 0.000018 | 0.038873 | 0.000379 | -19.1 | -9.8  | 0.5 | 1455 | 2036 | -0.96 |
| 16             | 441.9 | 0.282236 | 0.000019 | 0.001823 | 0.000020 | 0.045088 | 0.000834 | -19.5 | -10.3 | 0.7 | 1488 | 2070 | -0.95 |
| 17             | 441.9 | 0.282262 | 0.000017 | 0.001864 | 0.000003 | 0.049603 | 0.000241 | -18.6 | -9.4  | 0.6 | 1453 | 2014 | -0.94 |
| 18             | 441.9 | 0.282241 | 0.000016 | 0.001788 | 0.000011 | 0.046640 | 0.000331 | -19.3 | -10.1 | 0.6 | 1479 | 2057 | -0.95 |
