# Supplementary material
Source: MDPI journal article supplement (https://www.mdpi.com/2075-163X/13/11/1427)
Supplement: s1 [file s1]

Supplementary table S3 Whole-rock trace–element (ppm) compositions of the Wugongshan granites

| Sample    | La    | Ce    | Pr    | Nd    | Sm    | Eu     | Gd     | Tb    | Dy    | Ho    | Er    | Tm                   | Yb                   | Lu                   | Y      | Cs     | Rb     | Ba          |
|-----------|-------|-------|-------|-------|-------|--------|--------|-------|-------|-------|-------|----------------------|----------------------|----------------------|--------|--------|--------|-------------|
| CJZK05-1  | 54.32 | 51.61 | 50.69 | 49.72 | 52.51 | 72.19  | 71.76  | 71.99 | 71.64 | 70.63 | 71.79 | 71.58                | 73.53                | 70.95                | 71.24  | 7.24   | 203.72 | 551.89      |
| CJZK05-2  | 17.69 | 16.42 | 15.38 | 15.45 | 14.35 | 14.64  | 14.64  | 14.92 | 15.22 | 15.80 | 14.87 | 15.99                | 14.90                | 16.14                | 14.64  | 13.99  | 207.74 | 402.33      |
| DJFZK02-3 | 1.59  | 1.84  | 3.12  | 0.85  | 1.57  | 1.02   | 1.12   | 0.80  | 1.38  | 1.55  | 0.97  | 0.81                 | 0.65                 | 0.82                 | 0.86   | 4.99   | 105.24 | 1372.09     |
| DJFZK02-4 | 3.96  | 6     | 6.91  | 6.39  | 6.44  | 1.05   | 1.00   | 0.97  | 0.74  | 0.98  | 0.99  | 0.47                 | 0.61                 | 0.64                 | 0.74   | 10.23  | 160.36 | 1164.57     |
| DJFZK01-1 | 0.08  | 0.12  | 0.18  | 0.11  | 0.12  | 0.04   | 0.05   | 0.03  | 0.04  | 0.05  | 0.05  | 0.03                 | 0.06                 | 0.03                 | 0.04   | 5.45   | 98.87  | 1087.60     |
| DJFZK01-2 | 0.56  | 0.35  | 1.33  | 0.2   | 0.44  | 0.20   | 0.21   | 0.20  | 0.19  | 0.25  | 0.18  | 0.20                 | 0.15                 | 0.21                 | 0.22   | 6.79   | 126.73 | 832.47      |
| XQZK11-1  | 9.22  | 6.18  | 7.71  | 7.68  | 8.73  | 1.08   | 1.84   | 1.13  | 0.53  | 0.71  | 0.98  | 0.42                 | 0.53                 | 0.35                 | 1.37   | 22.36  | 231.38 | 101.43      |
| XQZK11-2  | 5.89  | 9.79  | 7.13  | 13.45 | 10.11 | 0.59   | 0.53   | 0.68  | 0.52  | 0.73  | 0.55  | 0.45                 | 0.34                 | 0.46                 | 0.57   | 7.44   | 129.10 | 612.28      |
| XQZK12-3  | 3.59  | 2.18  | 2.55  | 1.99  | 2.7   | 3.94   | 6.00   | 5.44  | 3.89  | 5.15  | 3.69  | 4.27                 | 3.91                 | 4.24                 | 4.01   | 14.98  | 162.61 | 402.41      |
| XQZK13-2  | 0.38  | 2.04  | 1.65  | 0.32  | 0.39  | 3.91   | 1.59   | 2.33  | 4.53  | 3.05  | 4.92  | 4.88                 | 4.46                 | 5.29                 | 4.71   | 17.06  | 217.62 | 721.03      |
| XQZK13-4  | 0.09  | 0.04  | 0.4   | 0.04  | 0.06  | 0.09   | 0.09   | 0.09  | 0.09  | 0.10  | 0.09  | 0.09                 | 0.10                 | 0.11                 | 0.10   | 9.17   | 182.34 | 567.02      |
| XQZK12-5  | 2.49  | 3.39  | 2.81  | 3.75  | 2.44  | 1.04   | 0.96   | 1.19  | 1.09  | 0.78  | 0.75  | 0.57                 | 0.52                 | 0.54                 | 1.28   | 18.34  | 257.38 | 267.99      |
| CJZK06-2  | 99.88 | 99.95 | 99.85 | 99.92 | 99.86 | 99.80  | 99.79  | 99.75 | 99.83 | 99.77 | 99.84 | 99.76                | 99.77                | 99.78                | 99.79  | 12.52  | 183.95 | 386.25      |
| CJZK06-4  | 4.51  |       | 1.98  |       | 0.84  | 31.27  | 26.13  | 28.25 | 29.93 | 26.38 | 28.66 | 26.78                | 32.32                | 24.89                | 26.49  | 26.10  | 242.08 | 390.21      |
| WGS06027  | 31.87 | 30.02 | 26.43 | 33.55 | 26.57 | 4.83   | 8.42   | 5.09  | 2.07  | 2.9   | 4.31  | 1.51                 | 1.99                 | 1.03                 | 6.24   | 30.29  | 477.50 | 2.55        |
| WGS06028  | 31.2  | 19.1  | 22.23 | 17.5  | 23.45 | 33.76  | 51.38  | 46.7  | 33.34 | 44.04 | 31.52 | 36.43                | 33.34                | 36.16                | 34.45  | 9.08   | 216.28 | 1019.73     |
| Sample    | Th    | U     | Nb    | Ta    | Pb    | Sr     | Zr     | Hf    | V     | Co    | Ni    | (La/Yb) <sub>N</sub> | (La/Sm) <sub>N</sub> | (Gd/Yb) <sub>N</sub> | ΣREE   | ΣLREE  | ΣHREE  | ΣLREE/ΣHREE |
| CJZK05-1  | 17.38 | 6.57  | 12.04 | 1.34  | 37.69 | 173.45 | 152.93 | 4.40  | 41.56 | 5.97  | 6.23  | 10.49                | 3.81                 | 1.77                 | 168.71 | 152.48 | 16.23  | 9.39        |
| CJZK05-2  | 21.96 | 7.64  | 12.75 | 1.47  | 38.83 | 132.12 | 149.90 | 4.50  | 46.15 | 6.65  | 6.93  | 11.38                | 3.82                 | 1.78                 | 203.30 | 184.64 | 18.66  | 9.89        |
| DJFZK02-3 | 23.00 | 2.38  | 13.82 | 0.75  | 28.54 | 171.86 | 219.42 | 6.32  | 24.92 | 4.52  | 6.25  | 20.58                | 5.24                 | 2.59                 | 277.56 | 258.68 | 18.88  | 13.70       |
| DJFZK02-4 | 27.73 | 2.24  | 13.57 | 0.67  | 20.61 | 252.47 | 372.93 | 10.30 | 23.31 | 4.41  | 5.76  | 21.02                | 5.69                 | 2.57                 | 334.05 | 312.27 | 21.79  | 14.33       |
| DJFZK01-1 | 27.28 | 2.53  | 15.09 | 1.22  | 22.72 | 157.24 | 236.89 | 6.40  | 24.14 | 4.65  | 8.63  | 22.99                | 5.19                 | 2.97                 | 331.33 | 309.77 | 21.56  | 14.36       |
| DJFZK01-2 | 23.99 | 2.85  | 14.28 | 0.73  | 27.85 | 130.60 | 208.35 | 6.08  | 23.23 | 4.12  | 5.59  | 19.19                | 4.42                 | 2.79                 | 281.21 | 259.62 | 21.59  | 12.02       |
| XQZK11-1  | 1.40  | 8.77  | 19.92 | 8.76  | 32.32 | 28.34  | 31.09  | 1.99  | 1.82  | 0.33  | 1.92  | 2.91                 | 2.05                 | 0.99                 | 13.29  | 10.02  | 3.27   | 3.06        |
| XQZK11-2  | 21.40 | 3.75  | 9.70  | 0.84  | 27.78 | 120.14 | 183.67 | 5.90  | 19.66 | 3.23  | 2.81  | 14.22                | 4.22                 | 2.11                 | 221.76 | 203.13 | 18.63  | 10.90       |
| XQZK12-3  | 8.64  | 4.49  | 8.41  | 1.46  | 35.62 | 180.88 | 110.05 | 3.11  | 16.85 | 2.92  | 3.65  | 16.63                | 5.10                 | 2.13                 | 75.12  | 69.10  | 6.02   | 11.48       |
| XQZK13-2  | 14.75 | 1.61  | 14.42 | 0.74  | 14.76 | 172.77 | 222.04 | 5.83  | 65.49 | 8.85  | 7.74  | 25.97                | 5.58                 | 3.09                 | 241.36 | 227.05 | 14.30  | 15.88       |
| XQZK13-4  | 10.58 | 1.82  | 10.64 | 0.63  | 18.31 | 117.68 | 169.25 | 4.70  | 56.31 | 7.17  | 6.88  | 20.88                | 5.14                 | 2.61                 | 175.06 | 162.99 | 12.06  | 13.51       |
| XQZK12-5  | 8.42  | 7.68  | 14.57 | 2.32  | 34.88 | 66.53  | 67.22  | 2.25  | 11.90 | 1.74  | 2.89  | 15.23                | 3.36                 | 2.86                 | 75.54  | 68.58  | 6.96   | 9.85        |

|          |       |       |       |      |       |        |        |      |       |      |      |       |      |      |        |        |       |       |
|----------|-------|-------|-------|------|-------|--------|--------|------|-------|------|------|-------|------|------|--------|--------|-------|-------|
| CJZK06-2 | 15.53 | 4.85  | 12.21 | 1.51 | 34.40 | 145.69 | 146.76 | 4.44 | 52.54 | 7.30 | 7.22 | 7.91  | 3.48 | 1.50 | 145.75 | 128.59 | 17.16 | 7.49  |
| CJZK06-4 | 12.64 | 7.40  | 9.79  | 1.15 | 13.21 | 80.47  | 128.22 | 3.84 | 42.68 | 5.12 | 6.68 | 9.58  | 3.83 | 1.61 | 95.48  | 85.85  | 9.63  | 8.91  |
| WGS06027 | 8.83  | 32.48 | 29.33 | 6.11 | 20.65 | 3.53   | 37.67  | 2.71 | 0.45  | 0.10 | 0.46 | 1.99  | 1.22 | 0.83 | 38.94  | 30.26  | 8.68  | 3.49  |
| WGS06028 | 24.70 | 2.13  | 10.63 | 0.74 | 25.27 | 199.89 | 215.61 | 6.19 | 18.71 | 3.80 | 5.40 | 15.74 | 5.18 | 1.97 | 302.83 | 279.73 | 23.10 | 12.11 |
